# Supplementary material for: The distribution of new HIV infections by mode of exposure in Morocco
Source: PubMed Central journal article supplement — Sex Transm Infect. 2013 Feb 14;89(Suppl 3):iii49–56. doi: 10.1136/sextrans-2012-050844 (PMC3841748; doi:10.1136/sextrans-2012-050844), 2013-02-14
Supplement: sextrans-2012-050844-s1.pdf [file sextrans-2012-050844-s1.pdf]

## Supplementary Information

# The distribution of new HIV infections by mode of exposure in Morocco

Ghina R. Mumtaz,<sup>1</sup> Silva P. Kouyoumjian<sup>1</sup>, Nahla Hilmi,<sup>1</sup> Ahmed Zidouh,<sup>2</sup> Houssine El Rhilani,<sup>3</sup> Kamal Alami,<sup>3</sup> Aziza Bennani,<sup>4</sup> Eleanor Gouws,<sup>5</sup> Peter D. Ghys,<sup>5</sup> and Laith J. Abu-Raddad<sup>1,6,7</sup>

<sup>1</sup>*Infectious Disease Epidemiology Group, Weill Cornell Medical College - Qatar, Cornell University, Qatar Foundation - Education City, Doha, Qatar*

<sup>2</sup>*National consultant, Epidemiologist, Morocco*

<sup>3</sup>*Joint United Nations Programme on HIV/AIDS, Morocco country office, Rabat, Morocco*

<sup>4</sup>*Morocco National AIDS Programme, Ministry of Health, Rabat, Morocco*

<sup>5</sup>*Evidence, Innovation and Policy Department, Joint United Nations Programme on HIV/AIDS, Geneva, Switzerland*

<sup>6</sup>*Department of Public Health, Weill Cornell Medical College, Cornell University, New York, New York, USA*

<sup>7</sup>*Vaccine and Infectious Disease Division, Fred Hutchinson Cancer Research Center, Seattle, Washington, USA*

**Reprints or correspondence:** Laith J. Abu-Raddad, PhD, Infectious Disease Epidemiology Group, Weill Cornell Medical College - Qatar, Qatar Foundation - Education City, P.O. Box 24144, Doha, Qatar. Telephone: + (974) 4492-8321. Fax: + (974) 4492-8333. E-mail: [lja2002@qatar-med.cornell.edu](mailto:lja2002@qatar-med.cornell.edu)

## 1. FURTHER DETAILS ON DATA REVIEW

The following material describes the different data sources and the details of the search criteria for the comprehensive review of HIV in the Middle East and North Africa (MENA) undertaken as part of the MENA HIV/AIDS Epidemiology Synthesis Project.[1, 2] The Synthesis Project was the main source of data for our study. The project identified and retrieved data through an extensive search of evidence on HIV and related outcomes over a span of nearly a decade so far.

The sources of data included:

1. Scientific literature search of PubMed (Medline) using a strategy with both free text and MeSH headings, and with no language or year limitations. The following set of criteria were used as part of the search of PubMed:

- Studies of HIV infectious spread in its different modes of transmission under the strategy of ("HIV Seropositivity" OR "HIV" OR "HIV Infections") AND ("Middle East" OR "Islam" OR "Arabs" OR "Arab World" OR "Africa, Northern" OR "Mauritania" OR "Sudan" OR "Somalia" OR "Djibouti" OR "Pakistan").
- Studies of sexual behavior and levels of risk behavior under the strategy of ("Sexual Behavior" OR "Sexual Partners" OR "Sexual Abstinence" OR "Unsafe Sex" OR "Sexology" OR "Reproductive Behavior" OR "Safe Sex" OR "Condoms" OR "Sex") AND ("Middle East" OR "Islam" OR "Arabs" OR "Arab World" OR "Africa, Northern" OR "Mauritania" OR "Sudan" OR "Somalia" OR "Djibouti" OR "Pakistan").
- Studies of herpes simplex virus type 2 sero-prevalence under the strategy of ("Herpesvirus 2, Human" OR "Herpes Genitalis") AND ("Middle East" OR "Islam" OR "Arabs" OR "Arab World" OR "Africa, Northern" OR "Mauritania" OR "Sudan" OR "Somalia" OR "Djibouti" OR "Pakistan").
- Studies of human papillomavirus and cervical cancer under the strategy of "Papillomavirus Infections" OR "Uterine Cervical Neoplasms") AND ("Middle East" OR "Islam" OR "Arabs" OR "Arab World" OR "Africa, Northern" OR "Mauritania" OR "Sudan" OR "Somalia" OR "Djibouti" OR "Pakistan").

- Studies of bacterial sexually transmitted infections under the strategy of ("Chlamydia" OR "Chlamydia Infections" OR "Chlamydia trachomatis" OR "Gonorrhoea" OR "Neisseria gonorrhoeae" OR "Syphilis" OR "Vaginosis, Bacterial" OR "Pelvic Inflammatory Disease") AND ("Middle East" OR "Arabs" OR "Islam" OR "Arab World" OR "Africa, Northern" OR "Mauritania" OR "Sudan" OR "Somalia" OR "Djibouti" OR "Pakistan").
- Studies of hepatitis C virus under the strategy of ("Hepatitis C" OR "Hepatitis C Antibodies" OR "Hepatitis C Antigens") AND ("Middle East" OR "Islam" OR "Iran" OR "Arabs" OR "Arab World" OR "Africa, Northern" OR "Mauritania" OR "Sudan" OR "Somalia" OR "Djibouti" OR "Pakistan").

2. Peer-reviewed publications published in local and regional research journals not indexed in PubMed.

3. Country-level reports and databases, governmental and non-governmental organizations' studies and publications, as well as other institutional reports related to HIV and sexually transmitted infections (STIs) in MENA. These include also countries' case notification reports.

4. International organizations' reports and databases related to HIV and other STIs. Among the organizations from which we obtained reports and data are UNAIDS, WHO, World Bank, United Nations Children's Fund (UNICEF), United Nations Office on Drugs and Crime (UNODC), International Agency for Research on Cancer (IARC), International Organization for Migration (IOM), International Centre for Prison Studies (ICPS), Office of the UN High Commissioner for Refugees (UNHCR), Population Reference Bureau (PRB) and Family Health International (FHI). The US Census Bureau database of HIV/AIDS, a compilation of global HIV prevalence studies irrespective of collection methodology, was searched,[3] so was the WHO/EMRO HIV testing database.[4] Demographic and Health Survey (DHS) reports of MENA countries were also reviewed.

5. Consultations with key experts, public health officials, researchers, and academics in the region and beyond.

Studies and data sources were retrieved through the above searches and screened for relevance. The criteria for inclusion were the presence of a biological measurement of HIV or STIs or any related sexual or injecting behavioral data. For further reassurance that no relevant study was missed as part of the MENA comprehensive search, we repeated the Medline search for HIV infection using criteria specific to Morocco.

## **2. MODES OF TRANSMISSION (MoT) MODEL PARAMETRIZATION**

The main sources of data for the parameter choices were:

1. The review of HIV epidemiological evidence in Morocco.
2. The Synthesis Project review of HIV epidemiology in other MENA countries.[1, 2] This latter review is referred to in the parameters tables as ‘SMENA: Studies in other MENA countries’.
3. Global HIV data, referred to as ‘GA: Global analyses’.
4. Consensus agreement following discussions among HIV/AIDS stakeholders in Morocco and the research team during the national MoT workshop that was held in Morocco during the course of the MoT work, referred to as ‘CA’.

The tables below describe the different parameters used in the MoT model, their values, the justifications and/or calculations behind their choices, and the sources of data used for their estimation. In many cases, the final parameter value used was a representative or reasonable value based on a combination of the above data sources.

### **2.1 Biological parameters**

**Table S2.1** Biological HIV transmission parameters of the MoT model

| <b>Parameter</b>                                                                                  | <b>Value</b> | <b>Justification</b>                                                                                            | <b>Reference</b> |
|---------------------------------------------------------------------------------------------------|--------------|-----------------------------------------------------------------------------------------------------------------|------------------|
| Transmission probability per HIV exposure from needle sharing                                     | 0.008        | Systematic review and meta-analysis of HIV transmission probability per coital act in observational studies     | [5, 6]           |
| Transmission probability per non-commercial vaginal sex act                                       | 0.0034       | Systematic review and meta-analysis of HIV transmission probability per coital act in observational studies     | [6, 7]           |
| Transmission probability per commercial vaginal sex act                                           | 0.0051       | Systematic review and meta-analysis of HIV transmission probability per coital act in observational studies     | [6, 7]           |
| Transmission probability per anal sex act                                                         | 0.01         | Systematic review and meta-analysis of HIV transmission probability per coital act in observational studies     | [6-8]            |
| Reduction in female to male transmission probability per vaginal sex act due to male circumcision | 60%          | Finding of three clinical trials                                                                                | [9-11]           |
| Prevalence of male circumcision                                                                   | 99%          | More than 99% of the population of Morocco practice male circumcision as a religious obligation and based on CA |                  |
| Transmission probability per HIV exposure from medical injections                                 | 0.004        | Systematic review and meta-analysis of HIV transmission probability per injection in observational studies      | [5, 6]           |
| Transmission probability per HIV exposure from blood transfusions                                 | 0.925        | Systematic review and meta-analysis of HIV transmission probability per transfusion in observational studies    | [5, 6]           |

MoT, modes of transmission; CA, consensus agreement in the national MoT workshop.

## 2.2 Demographic attributes for Morocco

**Table S2.2** Demographic attributes for Morocco

| <b>Parameter</b>                             | <b>Value</b> | <b>Reference</b> |
|----------------------------------------------|--------------|------------------|
| Total population size in Morocco (TP)        | 29,891,708   | [12]             |
| Total 15-49 yrs. adult population size (TAP) | 17,829,000   | [13]             |
| Male (TMP)                                   | 8,914,500    | [13]             |
| Female (TFP)                                 | 8,914,500    | [13]             |
| Adult (15-49 yrs.) HIV prevalence            | 0.11%        | [14, 15]         |

## 2.3 Risk group size estimates

**Table S2.3** Risk group size estimate for each HIV risk group in the Morocco MoT model

| Population                            | Prevalence of risk                                                                                                           |                                                                                           |                                                                                                                                    | Population size estimate                                                                                   |                                                                                        |                                                                                        |
|---------------------------------------|------------------------------------------------------------------------------------------------------------------------------|-------------------------------------------------------------------------------------------|------------------------------------------------------------------------------------------------------------------------------------|------------------------------------------------------------------------------------------------------------|----------------------------------------------------------------------------------------|----------------------------------------------------------------------------------------|
|                                       | Total (TAP)                                                                                                                  | Male (TMP)                                                                                | Female (TFP)                                                                                                                       | Total (TAP)                                                                                                | Male (TMP)                                                                             | Female (TFP)                                                                           |
| <b>IDUs</b>                           | 0.1%                                                                                                                         | 0.19%                                                                                     | 0.02%                                                                                                                              | 18,500                                                                                                     | 16,576                                                                                 | 1,924                                                                                  |
| Calculation                           | # IDUs/ TAP                                                                                                                  | (total # IDUs x (1-fraction of IDUs who are female))/ TMP                                 | (# IDUs x fraction of IDUs who are female)/ TFP                                                                                    |                                                                                                            | Total # IDUs x (1-fraction of IDUs who are female)                                     | Total # IDUs x fraction of IDUs who are female                                         |
| Justification &/or reference          | UNODC data[16]                                                                                                               | Fraction of IDUs who are female: 10.4%[17]                                                | Fraction of IDUs who are female: 10.4%[17]                                                                                         | UNODC data[16]                                                                                             | Fraction of IDUs who are female: 10.4%[17]                                             | UNODC data[16]                                                                         |
| <b>Stable sexual partners of IDUs</b> | 0.05%                                                                                                                        | 0.01%                                                                                     | 0.09%                                                                                                                              | 9,250                                                                                                      | 962                                                                                    | 8,288                                                                                  |
| Calculation                           | (Fraction of the TMP who are stable sexual partners of IDUs + Fraction of the TFP who are stable sexual partners of IDUs) /2 | Prevalence of IDU among females x fraction of IDUs who are in a stable sexual partnership | Prevalence of IDU among males x fraction of IDUs who are in a stable sexual partnership                                            | # of males in a stable sexual partnership with IDUs + # of female in a stable sexual partnership with IDUs | # of female IDUs x fraction of IDUs who are in a stable sexual partnership             | # of male IDUs x fraction of IDUs who are in a stable sexual partnership               |
| Justification &/or reference          |                                                                                                                              | 50% of IDUs are in a stable sexual partnership: RV based on SMENA,[1] on CA, and on GA    | 50% of IDUs are in a stable sexual partnership: RV based on SMENA,[1] on CA, and on GA                                             |                                                                                                            | 50% of IDUs are in a stable sexual partnership: RV based on SMENA,[1] on CA, and on GA | 50% of IDUs are in a stable sexual partnership: RV based on SMENA,[1] on CA, and on GA |
| <b>FSWs</b>                           | 0.375%                                                                                                                       | --                                                                                        | 0.75%                                                                                                                              | 66,859                                                                                                     | --                                                                                     | 66,859                                                                                 |
| Calculation                           | Half the prevalence of sex work among females                                                                                |                                                                                           |                                                                                                                                    | Prevalence of sex work among females x TFP                                                                 |                                                                                        | Prevalence of sex work among females x TFP                                             |
| Justification &/or reference          |                                                                                                                              |                                                                                           | Based on one study among hospital attendees,[18] in the intermediate to high range for available data in SMENA,[1] and based on CA |                                                                                                            |                                                                                        |                                                                                        |
| <b>Clients of FSWs</b>                | 3.75%                                                                                                                        | 7.5%                                                                                      | --                                                                                                                                 | 668,588                                                                                                    | 668,588                                                                                | --                                                                                     |
| Calculation                           | Half of the fraction of males seeking FSWs                                                                                   |                                                                                           |                                                                                                                                    | Fraction of males seeking FSWs x TMP                                                                       | Fraction of males seeking FSWs x TMP                                                   |                                                                                        |
| Justification &/or reference          |                                                                                                                              | Based on CA                                                                               |                                                                                                                                    |                                                                                                            |                                                                                        |                                                                                        |

**Table S2.3** continued. Risk group size estimate for each HIV risk group in the Morocco MoT model

| Population                                    | Prevalence of risk                                                               |                                                                                                                         |                                                                                            | Population size estimate                                            |                                                   |                                                            |
|-----------------------------------------------|----------------------------------------------------------------------------------|-------------------------------------------------------------------------------------------------------------------------|--------------------------------------------------------------------------------------------|---------------------------------------------------------------------|---------------------------------------------------|------------------------------------------------------------|
|                                               | Total (TAP)                                                                      | Male (TMP)                                                                                                              | Female (TFP)                                                                               | Total (TAP)                                                         | Male (TMP)                                        | Female (TFP)                                               |
| <b>Stable sexual partners of FSWs clients</b> | 1.96%                                                                            | --                                                                                                                      | 3.92%                                                                                      | 349,671                                                             | --                                                | 349,671                                                    |
| Calculation                                   | Half the fraction among females                                                  |                                                                                                                         | Fraction of TFP who are married x fraction of the TMP seeking FSWs                         | Fraction of the TFP who are partners of FSWs clients x TFP          |                                                   | Fraction of the TFP who are partners of FSWs clients x TFP |
| Justification &/or reference                  |                                                                                  |                                                                                                                         | 52.3% of women are married in Morocco[19]                                                  |                                                                     |                                                   |                                                            |
| <b>MSM</b>                                    | 0.25%                                                                            | 0.5%                                                                                                                    | --                                                                                         | 44,573                                                              | 44,573                                            | --                                                         |
| Calculation                                   | Half the prevalence of MSM among males                                           |                                                                                                                         |                                                                                            | Prevalence of MSM among males x TMP                                 | Prevalence of MSM among males x TMP               |                                                            |
| Justification &/or reference                  |                                                                                  | RsV based on 3.7% of <i>sexually active youth ever</i> having anal sex with males,[20] and based on SMENA[1] and on CA. |                                                                                            |                                                                     |                                                   |                                                            |
| <b>Stable female partners of MSM</b>          | 0.05%                                                                            | --                                                                                                                      | 0.1%                                                                                       | 8,915                                                               | 8,915                                             |                                                            |
| Calculation                                   | Half the fraction of women who are partners of MSM                               |                                                                                                                         |                                                                                            | Fraction of females who are partners of MSM x TFP                   | Fraction of females who are partners of MSM x TFP |                                                            |
| Justification &/or reference                  |                                                                                  |                                                                                                                         | 20% of MSM have female partners (RV based on SMENA[1] and on CA) and 0.5% of males are MSM |                                                                     |                                                   |                                                            |
| <b>People engaged in casual HS</b>            | 5.75%                                                                            | 10%                                                                                                                     | 1.5%                                                                                       | 1,025,168                                                           | 891,450                                           | 133,718                                                    |
| Calculation                                   | (Prevalence of casual HS among males + prevalence of casual HS among females) /2 |                                                                                                                         |                                                                                            | # of males engaged in casual HS + # of females engaged in casual HS | Prevalence of casual HS among males x TMP         | Prevalence of casual HS among females x TFP                |

**Table S2.3** continued. Risk group size estimate for each HIV risk group in the Morocco MoT model

| Population                                            | Prevalence of risk                                                                                                      |                                                                                                      |                                                                                                                                                                | Population size estimate                               |                                                                                |                                                                           |
|-------------------------------------------------------|-------------------------------------------------------------------------------------------------------------------------|------------------------------------------------------------------------------------------------------|----------------------------------------------------------------------------------------------------------------------------------------------------------------|--------------------------------------------------------|--------------------------------------------------------------------------------|---------------------------------------------------------------------------|
|                                                       | Total (TAP)                                                                                                             | Male (TMP)                                                                                           | Female (TFP)                                                                                                                                                   | Total (TAP)                                            | Male (TMP)                                                                     | Female (TFP)                                                              |
| Justification &/or reference                          |                                                                                                                         | RsV based on the measures of sexual behavior among the general population and on CA                  | 15% of the prevalence of casual HS among males, based on the study among youth where 36% of males and 5.2% of females declared having ever had vaginal sex[20] |                                                        |                                                                                |                                                                           |
| <b>Stable partners of people engaged in casual HS</b> | 2.54%                                                                                                                   | 0.075%                                                                                               | 5%                                                                                                                                                             | 452,411                                                | 6,686                                                                          | 445,725                                                                   |
| Calculation                                           | (Fraction of males who are partners of casual HS people + Fraction of females who are partners of casual HS people) / 2 | Fraction of females engaged in casual HS x fraction of them having steady/spousal partners           | Fraction of males engaged in casual HS x fraction of them having steady/spousal partners                                                                       |                                                        | Fraction of males who are stable partners of people engaged in casual HS x TMP | Fraction of females who are partners of people engaged in casual HS x TFP |
| Justification &/or reference                          |                                                                                                                         | Assuming a RsV of 5% of females engaged in casual HS having steady/spousal partners and based on CA  | Assuming a RsV of 50% of males engaged in casual HS having steady/spousal partners and based on CA                                                             |                                                        |                                                                                |                                                                           |
| <b>People with no risk HS this year</b>               | 27.5%                                                                                                                   | 20%                                                                                                  | 35%                                                                                                                                                            | 4,902,975                                              | 1,782,900                                                                      | 3,120,075                                                                 |
| Calculation                                           | (Prevalence of no risk HS in males + prevalence of no risk HS among females) / 2                                        |                                                                                                      |                                                                                                                                                                | # of males with no risk HS + # females with no risk HS | Fraction of the TMP with no risk HS x TMP                                      | Fraction of the TFP with no risk HS x TFP                                 |
| Justification &/or reference                          |                                                                                                                         | CA and RsV based on levels of reported sexual activity among youth and marriage rates in Morocco[20] | CA and RsV based on levels of reported sexual activity among youth and marriage rates in Morocco[20]                                                           |                                                        |                                                                                |                                                                           |
| <b>People with low risk HS</b>                        | 57.67%                                                                                                                  | 61.73%                                                                                               | 53.61%                                                                                                                                                         | 10,282,092                                             | 5,502,766                                                                      | 4,779,326                                                                 |



**Table S2.3** continued. Risk group size estimate for each HIV risk group in the Morocco MoT model

| Population                                      | Prevalence of risk                                                                               |                                                                                                  |                                                                                                  | Population size estimate                                                |                                                                    |                                                                    |
|-------------------------------------------------|--------------------------------------------------------------------------------------------------|--------------------------------------------------------------------------------------------------|--------------------------------------------------------------------------------------------------|-------------------------------------------------------------------------|--------------------------------------------------------------------|--------------------------------------------------------------------|
|                                                 | Total (TAP)                                                                                      | Male (TMP)                                                                                       | Female (TFP)                                                                                     | Total (TAP)                                                             | Male (TMP)                                                         | Female (TFP)                                                       |
| Calculation                                     |                                                                                                  |                                                                                                  |                                                                                                  | # of males engaged in low risk HS + # of females engaged in low risk HS | Prevalence of low risk HS among males x TMP                        | Prevalence of low risk HS among females x TFP                      |
| Justification &/or reference                    | Those who are not in any of the previous risk group categories nor their sexual partners/clients | Those who are not in any of the previous risk group categories nor their sexual partners/clients | Those who are not in any of the previous risk group categories nor their sexual partners/clients |                                                                         |                                                                    |                                                                    |
| <b>Population at risk of medical injections</b> | 100%                                                                                             | 100%                                                                                             | 100%                                                                                             | 17,829,000                                                              | 8,914,500                                                          | 8,914,500                                                          |
| Justification &/or reference                    | Assuming all the adult population is at risk                                                     | Assuming all the adult population is at risk                                                     | Assuming all the adult population is at risk                                                     | Assuming all the adult population is at risk                            | Assuming all the adult population is at risk                       | Assuming all the adult population is at risk                       |
| <b>Population at risk of blood transfusions</b> | 0.2%                                                                                             | 0.2%                                                                                             | 0.2%                                                                                             | 35,658                                                                  | 17,829                                                             | 17,829                                                             |
| Calculation                                     | (# of blood donations per year / # of transfusions per person) / TP                              | (# of blood donations per year / # of transfusions per person) / TP                              | (# of blood donations per year / # of transfusions per person) / TP                              | # of blood donations per year / # of transfusions per person            | (# of blood donations per year / # of transfusions per person) / 2 | (# of blood donations per year / # of transfusions per person) / 2 |
| Justification &/or reference                    | 203,000 blood donations per year[21] Average of 3 transf. per person                             | 203,000 blood donations per year[21] Average of 3 transf. per person                             | 203,000 blood donations per year[21] Average of 3 transf. per person                             |                                                                         |                                                                    |                                                                    |

MoT, modes of transmission; CA, consensus agreement in the national MoT workshop; FSWs, female sex workers; HS, heterosexual sex; GA, global analyses; IDUs, injecting drug users; MSM, men who have sex with men; RV, representative value; RsV, reasonable value; TAP, total adult population (15-49 years); TFP, total adult female population (15-49 years); TMP, total adult male population (15-49 years); SMENA, studies in other Middle East and North Africa countries; UNODC, United Nations Office on Drugs and Crime.

## 2.4 HIV prevalence

**Table S2.4** HIV prevalence for each HIV risk group in the Morocco MoT model

| <b>Population</b>                              | <b>Value</b> | <b>Justification</b>                                                                                                                                          | <b>Reference</b> |
|------------------------------------------------|--------------|---------------------------------------------------------------------------------------------------------------------------------------------------------------|------------------|
| IDUs                                           | 2%           | Representative value based on available point prevalence measures and on CA                                                                                   | Table 2 of [22]  |
| Stable sexual partners of IDUs                 | 1%           | Half of the HIV prevalence among IDUs based on CA                                                                                                             |                  |
| FSWs                                           | 2%           | Representative value based on available point prevalence measures and on CA                                                                                   | Table 2 of [22]  |
| Clients of FSWs                                | 0.5%         | Representative value based on available point prevalence measures among STD clinic attendees and on CA                                                        | Table 8 of [22]  |
| Stable partners of clients of FSWs             | 0.25%        | Half of the HIV prevalence among clients based on CA                                                                                                          |                  |
| MSM                                            | 2%           | Representative value based on available point prevalence measures and on CA                                                                                   | Table 2 of [22]  |
| Females partners of MSM                        | 1%           | Half of the HIV prevalence among MSM                                                                                                                          |                  |
| People engaged in casual HS                    | 0.22%        | Twice the prevalence of HIV in the adult population in Morocco and based on available prevalence measures among different general population groups and on CA | Table 6 of [22]  |
| Stable partners of people engaged in casual HS | 0.11%        | Half of the HIV prevalence among people engaged in casual HS                                                                                                  |                  |
| People engaged in low risk HS                  | 0.082%       | Average of HIV prevalence among ANC attendees and blood donors, and based on CA.                                                                              | Table 6 of [22]  |
| People with no risk HS this year               | 0.03%        | The value needed to achieve a 0.1% prevalence among the total population                                                                                      |                  |
| Blood transfusions                             | 0.032%       | HIV prevalence among blood donors                                                                                                                             | [21]             |

MoT, modes of transmission; ANC, antenatal clinics; FSWs, female sex workers; CA, consensus agreement; HS, heterosexual sex; IDUs, injecting drug users; MSM, men who have sex with men; STD, sexually transmitted disease.

## 2.5 Risk behavior parameters

**Table S2.5** Risk behavior parameters for each HIV risk group in the Morocco MoT model

| Risk behavior                                                                                                         | Value | Justification                                                                                                                                                                                                                                                                                                                                                                         | Reference |
|-----------------------------------------------------------------------------------------------------------------------|-------|---------------------------------------------------------------------------------------------------------------------------------------------------------------------------------------------------------------------------------------------------------------------------------------------------------------------------------------------------------------------------------------|-----------|
| <b>Partnerships, Number per year of:</b>                                                                              |       |                                                                                                                                                                                                                                                                                                                                                                                       |           |
| IDU partners per IDU                                                                                                  | 3     | CA and representative value based on SMENA and on GA                                                                                                                                                                                                                                                                                                                                  |           |
| Clients/partners per FSW                                                                                              | 100   | CA and representative value based SMENA and on the following specific data from Morocco: In one study, slightly over 50% of FSWs had one client during the last working day, 18% had two clients and 33.3% had less than one client. The average number of clients during the last 7 days was 4.3 clients. In another study, 70% of the respondents had more than 4 clients per week. | [23, 24]  |
| FSW partners per client                                                                                               | 4     | CA and in order to balance the number of acts between FSWs and clients                                                                                                                                                                                                                                                                                                                |           |
| MSM partners per MSM                                                                                                  | 5     | CA and representative value based on SMENA. Also, truck drivers in Morocco reported an average of 5 same-sex partners during the last year                                                                                                                                                                                                                                            | [25]      |
| Partners per person engaged in casual HS                                                                              | 2     | Based on CA                                                                                                                                                                                                                                                                                                                                                                           |           |
| Rate of medical injections per person per year                                                                        | 4.3   | Average value for the MENA region                                                                                                                                                                                                                                                                                                                                                     | [26]      |
| <b>Number of acts of exposure per year among:</b>                                                                     |       |                                                                                                                                                                                                                                                                                                                                                                                       |           |
| IDUs (# of shared injections per IDU per year)                                                                        | 50    | Representative value based on GA and on CA                                                                                                                                                                                                                                                                                                                                            |           |
| Stable heterosexual sex partners of IDUs (# sex acts per stable partner of IDU per year)                              | 50    | Representative value based on GA and on CA. Also, over 80% of women seeking antenatal or family planning services had sexual relations at least once per week.                                                                                                                                                                                                                        | [27]      |
| FSWs (# of sex acts per partner/client per FSW per year)                                                              | 4     | Representative value based on a total number of coital acts of 400 per year or about 1 act per day with a total of 100 partners per year and CA                                                                                                                                                                                                                                       |           |
| Clients of FSWs (# of sex acts per FSW per partner/client per year)                                                   | 10    | Based on CA                                                                                                                                                                                                                                                                                                                                                                           |           |
| Stable heterosexual sex partners of clients of FSWs (# of sex acts with stable partner per client of FSW per year)    | 50    | Representative value based on GA and on CA. Also, over 80% of women seeking antenatal or family planning services had sexual relations at least once per week.                                                                                                                                                                                                                        | [27]      |
| MSM (# of anal sex acts per MSM partner per year)                                                                     | 15    | Based on a total number of coital acts of 75 distributed over an average of 5 partners per year and CA                                                                                                                                                                                                                                                                                |           |
| Stable female heterosexual sex partners of MSM (# of sex acts between the MSM and his stable female partner per year) | 50    | Representative value based on GA and on CA. Also, over 80% of women seeking antenatal or family planning services had sexual relations at least once per week.                                                                                                                                                                                                                        | [27]      |
| People engaged in casual HS (# of casual sex acts per person engaged in casual HS)                                    | 20    | Based on CA                                                                                                                                                                                                                                                                                                                                                                           |           |

**Table S2.5** continued. Risk behavior parameters for each HIV risk group in the Morocco MoT model

| <b>Risk behavior</b>                                                                                                                         | <b>Value</b> | <b>Justification</b>                                                                                                                                                          | <b>Reference</b> |
|----------------------------------------------------------------------------------------------------------------------------------------------|--------------|-------------------------------------------------------------------------------------------------------------------------------------------------------------------------------|------------------|
| Stable heterosexual sex partners of people engaged in casual HS (# of sex acts between people engaged in casual HS and their stable partner) | 50           | Representative value based on GA and on CA. Also, over 80% of women seeking antenatal or family planning services had sexual relations at least once per week.                | [27]             |
| People engaged in low risk HS (# of sex acts per person)                                                                                     | 50           | Representative value based on GA and on CA                                                                                                                                    |                  |
| <b>Percentage of acts protected</b>                                                                                                          |              |                                                                                                                                                                               |                  |
| 1) <i>Sharing of needles/equipment among IDUs</i>                                                                                            | 50%          | Based on the prevalence of 63.9% of ever sharing syringes and representative value based on SMENA and on GA                                                                   | [1, 17]          |
| 2) <i>Condom use among:</i>                                                                                                                  |              |                                                                                                                                                                               |                  |
| IDUs and their stable heterosexual sex partners                                                                                              | 2%           | Based on the following DHS data: 11.4% of married women ever used a condom for contraception, while 1.5% were currently using them as a contraceptive method and on CA.       | [19]             |
| FSWs and their clients/partners                                                                                                              | 25%          | Based on the frequency of condom use in different population groups in Morocco and CA                                                                                         | Table 18 of [22] |
| Clients of FSWs and their stable heterosexual sex partners                                                                                   | 2%           | Based on the following DHS data: 11.4% of married women ever used a condom for contraception, while 1.5% were currently using them as a contraceptive method and based on CA. | [19]             |
| MSM                                                                                                                                          | 25%          | based on the frequency of condom use in different population groups in Morocco and on CA                                                                                      | Table 18 of [22] |
| MSM and their female heterosexual sex partners                                                                                               | 2%           | Based on the following DHS data: 11.4% of married women ever used a condom for contraception, while 1.5% were currently using them as a contraceptive method and CA.          | [19]             |
| People engaged in casual HS                                                                                                                  | 25%          | Based on the frequency of condom use in different population groups in Morocco and on CA                                                                                      | Table 18 of [22] |
| People engaged in casual HS and their steady/spousal heterosexual sex partners                                                               | 2%           | Based on the following DHS data: 11.4% of married women ever used a condom for contraception, while 1.5% were currently using them as a contraceptive method and CA.          | [19]             |
| People engaged in low risk HS                                                                                                                | 2%           | Based on the following DHS data: 11.4% of married women ever used a condom for contraception, while 1.5% were currently using them as a contraceptive method and CA.          | [19]             |
| Percentage of medical injections that are sterile and non-shared                                                                             | 99%          | Based on CA                                                                                                                                                                   |                  |
| Percentage of blood transfusions that are screened for HIV                                                                                   | 99%          | Based on Blood Bank data and on CA                                                                                                                                            | [15]             |

MoT, modes of transmission; CA, consensus agreement; DHS, Demographic and Health Survey; FSWs, female sex workers; GA, global analyses; HS, heterosexual sex; IDUs, injecting drug users; MSM, men who have sex with men; SMENA, studies in other Middle East and North Africa countries; STI, sexually transmitted infections.



#### 4. SUPPLEMENT TO DISCUSSION

Here are further data that are referred to in the Discussion section of the main text.

**Table S4.1** Distribution of notified HIV/AIDS cases by risk factor, 2005-9[28]

|                   | <b>Females N (%)</b> | <b>Males N (%)</b>  | <b>Total N (%)</b>  |
|-------------------|----------------------|---------------------|---------------------|
| Multiple partners | 732 (63%)            | 1,171 (82%)         | 1,903 (74%)         |
| Affected spouse   | 295 (25%)            | 87 (6%)             | 382 (15%)           |
| Drug use          | 14 (1%)              | 69 (5%)             | 83 (3%)             |
| Affected mother   | 23 (2%)              | 36 (3%)             | 59 (2%)             |
| Transfusion       | 11 (1%)              | 16 (1%)             | 27 (1%)             |
| Other             | 93 (8%)              | 45 (3%)             | 138 (5%)            |
| <b>Total</b>      | <b>1.168 (100%)</b>  | <b>1,424 (100%)</b> | <b>2,592 (100%)</b> |

**Table S4.2** HCV prevalence in different population groups in Morocco

| <b>Population Group</b>                  | <b>Prevalence Rate</b>            |
|------------------------------------------|-----------------------------------|
| Blood donors                             | 1.1%[29]                          |
| Pregnant women                           | 1.0%[29]                          |
| ANC attendees and family planning clinic | 0.5%[30]                          |
| Barbers, all men                         | 5.0%[31]                          |
| Hemodialysis patients                    | 35.1%, [29] 68.3%, [32] 76%, [33] |
| Hemophiliac patients                     | 42.4%[29]                         |

ANC, Antenatal clinic.

## REFERENCES

1. Abu-Raddad L, Akala FA, Semini I, et al. Characterizing the HIV/AIDS epidemic in the Middle East and North Africa: Time for Strategic Action. Middle East and North Africa HIV/AIDS Epidemiology Synthesis Project. World Bank/UNAIDS/WHO Publication. Washington DC: The World Bank Press; 2010.
2. Abu-Raddad LJ, Hilmi N, Mumtaz G, et al. Epidemiology of HIV infection in the Middle East and North Africa. *AIDS*. 2010;**24 Suppl 2**:S5-23.
3. US Census Bureau International Database. Washington DC, USA. [November 2011]; Available from: <http://www.census.gov/ipc/www/idb/>.
4. WHO/EMRO. Regional database on HIV testing. WHO Regional Office for the Eastern Mediterranean. Cairo, Egypt.
5. Baggaley RF, Boily MC, White RG, et al. Risk of HIV-1 transmission for parenteral exposure and blood transfusion: a systematic review and meta-analysis. *Aids*. 2006;**20**:805-12.
6. Baggaley RF, Boily MC, White RG, et al. Systematic Review of HIV-1 transmission probabilities in absence of antiretroviral therapy. Imperial College London, United Kingdom. 2004.
7. Boily MC, Baggaley RF, Wang L, et al. Heterosexual risk of HIV-1 infection per sexual act: systematic review and meta-analysis of observational studies. *Lancet Infect Dis*. 2009;**9**:118-29.
8. Baggaley RF, White RG, Boily MC. HIV transmission risk through anal intercourse: systematic review, meta-analysis and implications for HIV prevention. *Int J Epidemiol*. 2010.
9. Auvert B, Taljaard D, Lagarde E, et al. Randomized, controlled intervention trial of male circumcision for reduction of HIV infection risk: the ANRS 1265 Trial. *PLoS Med*. 2005;**2**:e298.
10. Bailey RC, Moses S, Parker CB, et al. Male circumcision for HIV prevention in young men in Kisumu, Kenya: a randomised controlled trial. *The Lancet*. 2007;**369**:643-56.
11. Gray RH, Kigozi G, Serwadda D, et al. Male circumcision for HIV prevention in men in Rakai, Uganda: a randomised trial. *The Lancet*. 2007;**369**:657-66.
12. Royaume du Maroc, Haut Commissariat au Plan. Recensement General de la Population et de l'habitat de 2004 - Population legale du Maroc. 2004.
13. UN Population Division [database on the Internet]. Available from: <http://esa.un.org/unpp/index.asp?panel=2>.
14. El-Rhilani H. UNAIDS Spectrum model for Morocco. Morocco UNAIDS Office. 2010.
15. Ministere de la Sante au Maroc. Rapport sur les estimations de l'epidemie du VIH/Sida au Maroc. 2009.
16. Aceijas C, Friedman SR, Cooper HL, et al. Estimates of injecting drug users at the national and local level in developing and transitional countries, and gender and age distribution. *Sex Transm Infect*. 2006;**82 Suppl 3**:iii10-7.
17. Ministere de la Sante au Maroc, Direction de l'Épidémiologie et de Lutte contre les Maladies, Programme de lutte contre la toxicomanie. Evaluation rapide de la situation sur le risque d'infection à VIH en relation avec l'usage des drogues injectées et injectables et à problème au Maroc. 2005.
18. Chaouki N, Bosch FX, Munoz N, et al. The viral origin of cervical cancer in Rabat, Morocco. *Int J Cancer*. 1998;**75**:546-54.
19. Ministere de la Sante DPRF/DPE/SEIS, ORC Macro Calverton, Project PAFAM Ligue des Etats Arabes. Morocco: Standard Demographic and Health Survey DHS, 2003-04. 2005.
20. Ministere de la Sante au Maroc, GTZ. ENQUETE «CONNAISSANCES, ATTITUDES ET PRATIQUES DES JEUNES CONCERNANT LES IST ET LE SIDA. 2007.
21. Morocco Blood Bank. Data provided by the Morocco Blood Bank. 2010.
22. Mumtaz G, Hilmi N, Zidouh A, et al. HIV modes of transmission analysis in Morocco. Kingdom of Morocco Ministry of Health and National STI/AIDS Programme, Joint United Nations Programme on HIV/AIDS, and Weill Cornell Medical College - Qatar. 2010.

23. Ministère de la Santé au Maroc, Programme National de lutte contre les IST/SIDA. Etudes de prévalence des IST chez les femmes qui consultent pour pertes vaginales et/ou douleurs du bas ventre. 2008.
24. Ministère de la Santé au Maroc. Surveillance des comportements à risque: le cas des professionnelles du sexe. 2008.
25. Association de Lutte Contre le Sida, Fonds Mondial, Total Maroc. Etude des caractéristiques, connaissances, attitudes et pratiques des routiers en matière des IST/Sida sur les grands axes du trafic au Maroc. Rapport Préliminaire (French) [A Study of the characteristics, knowledge, attitude and behavior of truck drivers in Morocco in relation to STIs/HIV. Preliminary report].
26. Hauri AM, Armstrong GL, Hutin YJ. The global burden of disease attributable to contaminated injections given in health care settings. *Int J STD AIDS*. 2004;**15**:7-16.
27. Ministère de la Santé au Maroc. Etude de prévalence des IST chez les femmes consultantes en SMI/PF al Wilaya de Rabat-Sale.
28. Ministère de la Santé au Maroc, DELM/PNLS. Situation épidémiologique du VIH/Sida et des IST au Maroc. February 2010.
29. Benjelloun S, Bahbouhi B, Sekkat S, et al. Anti-HCV seroprevalence and risk factors of hepatitis C virus infection in Moroccan population groups. *Res Virol*. 1996;**147**:247-55.
30. WHO/EMRO. Regional database on HIV/AIDS. WHO Regional Office for the Eastern Mediterranean. Cairo, Egypt.
31. Zahraoui-Mehadji M, Baakrim MZ, Laraqui S, et al. [Infectious risks associated with blood exposure for traditional barbers and their customers in Morocco]. *Sante*. 2004;**14**:211-6.
32. Sekkat S, Kamal N, Benali B, et al. [Prevalence of anti-HCV antibodies and seroconversion incidence in five haemodialysis units in Morocco]. *Nephrol Ther*. 2008;**4**:105-10.
33. Boulaajaj K, Elomari Y, Elmaliki B, et al. [Prevalence of hepatitis C, hepatitis B and HIV infection among haemodialysis patients in Ibn-Rochd university hospital, Casablanca]. *Nephrol Ther*. 2005;**1**:274-84.
