# Supplementary material for: The distribution of new HIV infections by mode of exposure in Morocco
Source: PubMed Central journal article supplement — Sex Transm Infect. 2013 Feb 14;89(Suppl 3):iii49–56. doi: 10.1136/sextrans-2012-050844 (PMC3841748; doi:10.1136/sextrans-2012-050844), 2013-02-14
Supplement: sextrans-2012-050844-s2.pdf [file sextrans-2012-050844-s2.pdf]

## توزيع الإصابات الحديثة بعدوى فيروس نقص المناعة البشرية بحسب أنماط التعرض للفيروس في المغرب

غنى ر. ممتاز، سيلفا ب. قيومجيان، نهلة حلمي، احمد زيدوح، حسين الغيلاني، كمال علمي، عزيزة بناني، اليانور غوس، بيتر دينيس غيس، ليث أبو رداد

### الملخص

**الأهداف:** عبر استخدام كمّ وافرٍ من البيانات التجريبية الحديثة، تهدف هذه الدراسة إلى تقدير نسبة توزيع الإصابات الحديثة بعدوى فيروس نقص المناعة البشرية في المغرب بحسب أنماط التعرض للفيروس ومن خلال استخدام النموذج الحسابي الخاص بطرق انتقال العدوى.

**المنهجية:** تم تطبيق النموذج الخاص بطرق انتقال العدوى من خلال التعاون بين وزارة الصحة المغربية وبرنامج الأمم المتحدة المشترك المعني بفيروس نقص المناعة البشرية / الإيدز. جرى تحديد المعطيات ضمن النموذج هذا بعد إجراء مراجعة شاملة لكافة البيانات المتعلقة بفيروس نقص المناعة البشرية والسلوكيات الخطرة في المغرب بخاصة من خلال مشروع الدراسات حول فيروس نقص المناعة البشرية/ الإيدز في الشرق الأوسط وشمال أفريقيا. وجرى تحليل أوجه عدم التيقن من أجل قياس موثوقية التقديرات التي تم التوصل إليها بالإضافة إلى قياس أوجه عدم التيقن حول هذه التقديرات.

**النتائج:** شكلت العاملات في حقل الجنس التجاري، وعمالهنّ، والرجال الذين يمارسون الجنس مع الرجال، ومتعاطو المخدرات بواسطة الحقن 14% و 24% و 14% و 7% على التوالي من مجموع الإصابات الحديثة بفيروس نقص المناعة البشرية. إثنان من كل ثلاث إصابات حديثة (67%) بفيروس نقص المناعة البشرية حصلت لدى العاملات في حقل الجنس التجاري، وعمالهنّ، والرجال الذين يمارسون الجنس مع الرجال، ومتعاطي المخدرات بواسطة الحقن أو لدى الشركاء الجنسيين الثابتين لهذه الفئات. وشكلت ممارسة الجنس المُتباين بطريقة عارضة 7% من مجموع الإصابات. أكثر من نصف الإصابات (52%) وقعت عند النساء و 71% من هذه الإصابات تمّت بواسطة زوج مصاب. غالبية الإصابات بالعدوى لدى الرجال (89%) سببها السلوكيات الخطرة ونسبة بسيطة جداً من الإصابات الحديثة (0.1%) سببها الحقن الطبية أو عمليات نقل الدم.

**الخلاصة:** تشكل الإصابات بفيروس نقص المناعة البشرية لدى الفئات الأكثر عرضة للخطر العامل الأساسي في انتشار هذا الوباء في المغرب وتشكل ممارسة الجنس التجاري النمط الأكثر تأثيراً على انتشار العدوى. من هنا، تبرز الحاجة إلى تركيز الإستجابة لهذا المرض على هذه الفئات خاصة عبر عملية رصد انتشار الفيروس بطريقة استباقية ومستدامة وزيادة الخدمات وتوسيع نطاقها الجغرافي خاصة تشجيع استخدام الواقي الجنسي لدى العاملات في حقل الجنس التجاري، تقديم المشورة والفحوصات الطوعية، التقليل من الضرر والعلاج.
